# Supplementary material for: The molecular portraits of breast tumors are conserved across microarray platforms
Source: Springer Nature journal article supplement (doi:10.1186/1471-2164-7-96), 2006-04-27
Supplement: Additional file 2 [file 1471-2164-7-96-s2.pdf]

| GEO sample names        | Intrinsic pair or RNA replicate | Age      | ER (H-positive, 0=negative) | HER2 (H-positive, 0=negative) | Node status (1=positive, 0=negative) | Grade | Size (1=<=2cm; 2=>2cm to <=5cm; 3=>5cm; 4=any size with distant dissemination) | RFS event (0=No relapse; 1=relapsed or dead of disease) | RFS months | Overall Survival Event (0=alive, 1=DOO or DOC) | Overall survival months | Array Name        | code in Figure 2 cluster | 1 sample/array per patient | Specimen SGP as Figure 2             | Intrinsic Subtype According to Figure 2                                           | Target Source 2 (CV)                                                              | Target source 1 (CV)                                                              |  |
|-------------------------|---------------------------------|----------|-----------------------------|-------------------------------|--------------------------------------|-------|--------------------------------------------------------------------------------|---------------------------------------------------------|------------|------------------------------------------------|-------------------------|-------------------|--------------------------|----------------------------|--------------------------------------|-----------------------------------------------------------------------------------|-----------------------------------------------------------------------------------|-----------------------------------------------------------------------------------|--|
| 020573-BC-Primary       | pair 1                          | training | 41                          | 1                             | 1                                    | 3     | 3                                                                              | 1                                                       | 10         | 0                                              | 22                      | H1A9529-0087C     | 9                        | 1                          | HER2+ER-                             | HER2+ER Breast primary for a patient with an associated brain metastases          | Stratagen Human Universal Reference that contained 1/10 added MCF7 and ME16C RNAs |                                                                                   |  |
| 020577-BC-Brain-Met     | pair 1                          | training |                             |                               |                                      |       |                                                                                |                                                         |            |                                                |                         | H1A5949-019       | 8                        | 1                          | HER2+ER-                             | HER2+ER Brain metastases with an associated primary 020573                        | Stratagen Human Universal Reference that contained 1/10 added MCF7 and ME16C RNAs |                                                                                   |  |
| 030064-BC-Brain-Met     | training                        | 32       | 1                           | 1                             | 2                                    | 1     | 1                                                                              | 51                                                      | 0          | 64                                             | H1A5365-900             | 4                 | 2                        | HER2+ER-                   | HER2+ER Brain metastases from breast | Stratagen Human Universal Reference that contained 1/10 added MCF7 and ME16C RNAs |                                                                                   |                                                                                   |  |
| 030432-BC-Brain-Met     | pair 2                          | training |                             |                               |                                      |       |                                                                                |                                                         |            |                                                |                         | H1A9529-042C      | 123                      | 3                          | LuminalB                             | Luminal Brain metastases from breast                                              | Stratagen Human Universal Reference that contained 1/10 added MCF7 and ME16C RNAs |                                                                                   |  |
| 030432-BC-Brain-Met-Int | pair 2                          | training |                             |                               |                                      |       |                                                                                |                                                         |            |                                                |                         | H1A9529-0001C     | 122                      | 1                          | LuminalB                             | Luminal Brain metastases from breast                                              | Stratagen Human Universal Reference that contained 1/10 added MCF7 and ME16C RNAs |                                                                                   |  |
| 030521-BC-Brain-Met     | pair 3                          | training |                             |                               |                                      |       |                                                                                |                                                         |            |                                                |                         | H1A7411-0109-C    | 6                        | 4                          | HER2+ER-                             | HER2+ER Brain metastases from breast                                              | Stratagen Human Universal Reference that contained 1/10 added MCF7 and ME16C RNAs |                                                                                   |  |
| 030521-BC-Brain-Met-Int | pair 3                          | training |                             |                               |                                      |       |                                                                                |                                                         |            |                                                |                         | H1A7411-0110-C    | 5                        | 5                          | HER2+ER-                             | HER2+ER Brain metastases from breast                                              | Stratagen Human Universal Reference that contained 1/10 added MCF7 and ME16C RNAs |                                                                                   |  |
| A1-01-Right-Lung-VIM    | pair 4                          | training |                             |                               |                                      |       |                                                                                |                                                         |            |                                                |                         | H1A6261-1489V2_Na | 31                       | 5                          | Basal                                | Basal Autopsy patient lung metastases from breast                                 | Stratagen Human Universal Reference that contained 1/10 added MCF7 and ME16C RNAs |                                                                                   |  |
| A1-17-Left-Primary-VIM  | pair 4                          | training | 64                          | 0                             | 1                                    | 3     | 4                                                                              | 1                                                       | 2          | 1                                              | 2                       | H1A9529-0094C     | 30                       | 30                         | Basal                                | Basal Autopsy patient breast primary                                              | Stratagen Human Universal Reference that contained 1/10 added MCF7 and ME16C RNAs |                                                                                   |  |
| A4-LL-Lung-Met          | pair 5                          | training | 44                          | 1                             | 1                                    | 3     | 4                                                                              | 1                                                       | 22         | 1                                              | 22                      | H1A6912-685V2     | 23                       | 6                          | Basal                                | HER2+ER Autopsy patient lung metastases from breast                               | Stratagen Human Universal Reference that contained 1/10 added MCF7 and ME16C RNAs |                                                                                   |  |
| A4-LL-Lung-Met          | pair 5                          | training |                             |                               |                                      |       |                                                                                |                                                         |            |                                                |                         | H1A6912-685V2     | 22                       | 22                         | Basal                                | HER2+ER Autopsy patient lung metastases from breast                               | Stratagen Human Universal Reference that contained 1/10 added MCF7 and ME16C RNAs |                                                                                   |  |
| A5-Skin1-Right-Met      | pair 6                          | training | 65                          | 0                             | 1                                    | 3     | 4                                                                              | 1                                                       | 26         | 1                                              | 26                      | H1A6912-685V2     | 56                       | 7                          | Basal                                | Basal Autopsy patient skin metastases from breast                                 | Stratagen Human Universal Reference that contained 1/10 added MCF7 and ME16C RNAs |                                                                                   |  |
| A5-Skin1-Left-Met       | pair 6                          | training |                             |                               |                                      |       |                                                                                |                                                         |            |                                                |                         | H1A6912-685V2     | 55                       | 55                         | Basal                                | Basal Autopsy patient skin metastases from breast                                 | Stratagen Human Universal Reference that contained 1/10 added MCF7 and ME16C RNAs |                                                                                   |  |
| BC00004                 | replicate pair                  | training | 67                          | 0                             | 0                                    | 2     | 1                                                                              | 0                                                       | 118        | 0                                              | 118                     | H1A9529-30C_Na    | 99                       | 8                          | LuminalA                             | Luminal Breast Tumor                                                              | Stratagen Human Universal Reference that contained 1/10 added MCF7 and ME16C RNAs |                                                                                   |  |
| BC00004-Repeat1         | replicate pair                  | training |                             |                               |                                      |       |                                                                                |                                                         |            |                                                |                         | H1A6433-2600V2    | 100                      | 100                        | LuminalA                             | Luminal Breast Tumor                                                              | Stratagen Human Universal Reference that contained 1/10 added MCF7 and ME16C RNAs |                                                                                   |  |
| BC00010                 | replicate pair                  | training | 47                          | 0                             | 1                                    | 2     | 3                                                                              | 1                                                       | 16         | 1                                              | 16                      | H1A9529-39C_Na    | 12                       | 9                          | HER2+ER-                             | HER2+ER Breast Tumor                                                              | Stratagen Human Universal Reference that contained 1/10 added MCF7 and ME16C RNAs |                                                                                   |  |
| BC00010-Repeat1         | replicate pair                  | training |                             |                               |                                      |       |                                                                                |                                                         |            |                                                |                         | H1A6433-2601V2    | 13                       | 13                         | HER2+ER-                             | HER2+ER Breast Tumor                                                              | Stratagen Human Universal Reference that contained 1/10 added MCF7 and ME16C RNAs |                                                                                   |  |
| BC00014                 | replicate pair                  | training | 69                          | 0                             | 1                                    | 3     | 4                                                                              | 1                                                       | 18         | 1                                              | 23                      | H1A9529-0045Na_C  | 142                      | 10                         | LuminalA                             | NB Breast Tumor                                                                   | Stratagen Human Universal Reference that contained 1/10 added MCF7 and ME16C RNAs |                                                                                   |  |
| BC00014-Repeat1         | replicate pair                  | training |                             |                               |                                      |       |                                                                                |                                                         |            |                                                |                         | H1A6730-644       | 143                      | 143                        | HER2+ER-                             | NB Breast Tumor                                                                   | Stratagen Human Universal Reference that contained 1/10 added MCF7 and ME16C RNAs |                                                                                   |  |
| BC00024T                | training                        | 68       | 0                           | 1                             | 3                                    | 3     | 1                                                                              | 3                                                       | 1          | 3                                              | 3                       | H1A_C_0077        | 35                       | 11                         | Basal                                | Basal Breast Tumor                                                                | Stratagen Human Universal Reference that contained 1/10 added MCF7 and ME16C RNAs |                                                                                   |  |
| BC00029T                | training                        | 44       | 0                           | 1                             | 3                                    | 0     | 0                                                                              | 62                                                      | 0          | 62                                             | 0                       | H1A_C_0078        | 26                       | 12                         | Basal                                | Basal Breast Tumor                                                                | Stratagen Human Universal Reference that contained 1/10 added MCF7 and ME16C RNAs |                                                                                   |  |
| BC00034                 | training                        | 68       | 0                           | 0                             | 2                                    | 1     | 0                                                                              | 81                                                      | 0          | 81                                             | 0                       | H1A9529-0041C_Na  | 121                      | 13                         | LuminalA                             | Luminal Breast Tumor                                                              | Stratagen Human Universal Reference that contained 1/10 added MCF7 and ME16C RNAs |                                                                                   |  |
| BC00036-Repeat1         | replicate pair                  | training |                             |                               |                                      |       |                                                                                |                                                         |            |                                                |                         | H1A6261-2600V2_Na | 19                       | 14                         | HER2+ER-                             | HER2+ER Breast Tumor                                                              | Stratagen Human Universal Reference that contained 1/10 added MCF7 and ME16C RNAs |                                                                                   |  |
| BC00036T                | replicate pair                  | training | 55                          | 0                             | 1                                    | 2     | 2                                                                              | 0                                                       | 10         | 0                                              | 10                      | H1A_C_0079        | 15                       | 15                         | HER2+ER-                             | HER2+ER Breast Tumor                                                              | Stratagen Human Universal Reference that contained 1/10 added MCF7 and ME16C RNAs |                                                                                   |  |
| BC00041                 | training                        | 46       | 0                           | 0                             | 3                                    | 2     | 1                                                                              | 13                                                      | 1          | 29                                             | 1                       | H1A9529-038C      | 45                       | 15                         | Basal                                | Basal Breast Tumor                                                                | Stratagen Human Universal Reference that contained 1/10 added MCF7 and ME16C RNAs |                                                                                   |  |
| BC00043T                | training                        | 43       | 0                           | 0                             | 3                                    | 2     | 0                                                                              | 76                                                      | 0          | 76                                             | 0                       | H1A_C_0080        | 42                       | 36                         | Basal                                | Basal Breast Tumor                                                                | Stratagen Human Universal Reference that contained 1/10 added MCF7 and ME16C RNAs |                                                                                   |  |
| BC00049T                | training                        | 43       | 0                           | 1                             | 3                                    | 2     | 1                                                                              | 48                                                      | 0          | 72                                             | 1                       | H1A_C_0081        | 41                       | 17                         | Basal                                | Basal Breast Tumor                                                                | Stratagen Human Universal Reference that contained 1/10 added MCF7 and ME16C RNAs |                                                                                   |  |
| BC00051                 | training                        | 51       | 0                           | 0                             | 2                                    | 2     | 0                                                                              | 68                                                      | 0          | 68                                             | 0                       | H1A9529-0040C_Na  | 21                       | 18                         | HER2+ER-                             | HER2+ER Breast Tumor                                                              | Stratagen Human Universal Reference that contained 1/10 added MCF7 and ME16C RNAs |                                                                                   |  |
| BC00052-post-chemo      | pair 7                          | training | 47                          | 0                             | 1                                    | 3     | 2                                                                              | 1                                                       | 14         | 1                                              | 18                      | H1A9529-040C      | 3                        | 19                         | HER2+ER-                             | HER2+ER Breast primary post chemotherapy                                          | Stratagen Human Universal Reference that contained 1/10 added MCF7 and ME16C RNAs |                                                                                   |  |
| BC00052-post-chemo-Int  | pair 7                          | training |                             |                               |                                      |       |                                                                                |                                                         |            |                                                |                         | H1A6261-2600V2    | 2                        | 2                          | HER2+ER-                             | HER2+ER Breast primary post chemotherapy                                          | Stratagen Human Universal Reference that contained 1/10 added MCF7 and ME16C RNAs |                                                                                   |  |
| BC00053                 | training                        | 71       | 0                           | 1                             | 3                                    | 2     | 1                                                                              | 27                                                      | 1          | 28                                             | 1                       | H1A6433-2608V2    | 16                       | 20                         | NB                                   | HER2+ER Breast Tumor                                                              | Stratagen Human Universal Reference that contained 1/10 added MCF7 and ME16C RNAs |                                                                                   |  |
| BC00057-post-chemo      | training                        | 51       | 0                           | 1                             | 3                                    | 4     | 1                                                                              | 8                                                       | 1          | 12                                             | 1                       | H1A6260-731       | 69                       | 21                         | HER2+ER-                             | Unclass Breast primary post chemotherapy                                          | Stratagen Human Universal Reference that contained 1/10 added MCF7 and ME16C RNAs |                                                                                   |  |
| BC00064-RECUR           | training                        | 44       | 0                           | 0                             | 3                                    | 1     | 1                                                                              | 10                                                      | 1          | 47                                             | 1                       | H1A6357-3552      | 35                       | 22                         | Basal                                | Basal Breast tumor recurrence                                                     | Stratagen Human Universal Reference that contained 1/10 added MCF7 and ME16C RNAs |                                                                                   |  |
| BC00066                 | training                        | 43       | 0                           | 1                             | 3                                    | 3     | 1                                                                              | 18                                                      | 1          | 18                                             | 1                       | H1A9529-022-C     | 145                      | 23                         | LuminalA                             | Unclass Breast Tumor                                                              | Stratagen Human Universal Reference that contained 1/10 added MCF7 and ME16C RNAs |                                                                                   |  |
| BC00070                 | pair 8                          | training | 38                          | 0                             | 0                                    | 2     | 2                                                                              | 1                                                       | 22         | 1                                              | 25                      | H1A9529-0096C     | 40                       | 24                         | Basal                                | Basal Breast Tumor                                                                | Stratagen Human Universal Reference that contained 1/10 added MCF7 and ME16C RNAs |                                                                                   |  |
| BC00070-Int             | pair 8                          | training |                             |                               |                                      |       |                                                                                |                                                         |            |                                                |                         | H1A6433-2610V2    | 39                       | 39                         | Basal                                | Basal Breast Tumor                                                                | Stratagen Human Universal Reference that contained 1/10 added MCF7 and ME16C RNAs |                                                                                   |  |
| BC00071                 | training                        | 33       | 0                           | 1                             | 2                                    | 2     | 1                                                                              | 16                                                      | 1          | 47                                             | 1                       | H1A9529-0089C     | 24                       | 25                         | HER2+ER-                             | HER2+ER Breast Tumor                                                              | Stratagen Human Universal Reference that contained 1/10 added MCF7 and ME16C RNAs |                                                                                   |  |
| BC00078T                | training                        | 68       | 0                           | 1                             | 3                                    | 3     | 0                                                                              | 12                                                      | 1          | 12                                             | 1                       | H1A4110_3579      | 38                       | 26                         | Basal                                | Basal Breast Tumor                                                                | Stratagen Human Universal Reference that contained 1/10 added MCF7 and ME16C RNAs |                                                                                   |  |
| BC00082T                | training                        | 84       | 0                           | 0                             | 3                                    | 2     | 0                                                                              | 27                                                      | 1          | 27                                             | 1                       | H1A4110_3580      | 37                       | 27                         | Basal                                | Basal Breast Tumor                                                                | Stratagen Human Universal Reference that contained 1/10 added MCF7 and ME16C RNAs |                                                                                   |  |
| BC00085                 | training                        | 24       | 0                           | 0                             | 2                                    | 1     | 0                                                                              | 19                                                      | 0          | 19                                             | 0                       | H1A6260-732       | 52                       | 28                         | Basal                                | Basal Breast Tumor                                                                | Stratagen Human Universal Reference that contained 1/10 added MCF7 and ME16C RNAs |                                                                                   |  |
| BR00-0284               | pair 9                          | training | 63                          | 0                             | 0                                    | 3     | 3                                                                              | 0                                                       | 43         | 0                                              | 43                      | 0                 | H1A6433-2611V2           | 11                         | 29                                   | HER2+ER-                                                                          | HER2+ER Breast Tumor                                                              | Stratagen Human Universal Reference that contained 1/10 added MCF7 and ME16C RNAs |  |
| BR00-0284-Int           | pair 9                          | training |                             |                               |                                      |       |                                                                                |                                                         |            |                                                |                         | H1A6433-2607V2    | 10                       | 10                         | HER2+ER-                             | HER2+ER Breast Tumor                                                              | Stratagen Human Universal Reference that contained 1/10 added MCF7 and ME16C RNAs |                                                                                   |  |
| BR00-0344               | replicate pair                  | training | 65                          | 1                             | 1                                    | 3     | 2                                                                              | 1                                                       | 7          | 1                                              | 30                      | H1A9529-028C_Na   | 72                       | 30                         | LuminalB                             | Luminal Breast Tumor                                                              | Stratagen Human Universal Reference that contained 1/10 added MCF7 and ME16C RNAs |                                                                                   |  |
| BR00-0344-Repeat1       | replicate pair                  | training |                             |                               |                                      |       |                                                                                |                                                         |            |                                                |                         | H1A6433-2598V2    | 73                       | 73                         | LuminalB                             | Luminal Breast Tumor                                                              | Stratagen Human Universal Reference that contained 1/10 added MCF7 and ME16C RNAs |                                                                                   |  |
| BR00-0365               | training                        | 43       | 1                           | 1                             | 3                                    | 4     | 0                                                                              | 22                                                      | 2          | 22                                             | 0                       | H1A_013Na_C       | 124                      | 31                         | LuminalB                             | Luminal Breast Tumor                                                              | Stratagen Human Universal Reference that contained 1/10 added MCF7 and ME16C RNAs |                                                                                   |  |
| BR00-0387               | replicate pair                  | training | 57                          | 1                             | 1                                    | 2     | 4                                                                              | 1                                                       | 6          | 0                                              | 51                      | H1A9529-025C_Na   | 102                      | 32                         | LuminalA                             | Luminal Breast Tumor                                                              | Stratagen Human Universal Reference that contained 1/10 added MCF7 and ME16C RNAs |                                                                                   |  |
| BR00-0387-Repeat1       | replicate pair                  | training |                             |                               |                                      |       |                                                                                |                                                         |            |                                                |                         | H1A6433-2597V2    | 103                      | 103                        | LuminalA                             | Luminal Breast Tumor                                                              | Stratagen Human Universal Reference that contained 1/10 added MCF7 and ME16C RNAs |                                                                                   |  |
| BR00-0504               | training                        | 88       | 1                           | 1                             | 1                                    | 2     | 0                                                                              | 39                                                      | 0          | 39                                             | 0                       | H1A6433-2988V2    | 94                       | 33                         | LuminalA                             | Luminal Breast Tumor                                                              | Stratagen Human Universal Reference that contained 1/10 added MCF7 and ME16C RNAs |                                                                                   |  |
| BR00-0572-VIM           | pair 10                         | training | 45                          | 0                             | 1                                    | 3     | 3                                                                              | 1                                                       | 11         | 0                                              | 42                      | H1A6433-2599V2    | 57                       | 34                         | Basal                                | Basal Breast Tumor                                                                | Stratagen Human Universal Reference that contained 1/10 added MCF7 and ME16C RNAs |                                                                                   |  |
| BR00-0572-VIM-Int       | pair 10                         | training |                             |                               |                                      |       |                                                                                |                                                         |            |                                                |                         | H1A6433-2599V2    | 58                       | 34                         | Basal                                | Basal Breast Tumor                                                                | Stratagen Human Universal Reference that contained 1/10 added MCF7 and ME16C RNAs |                                                                                   |  |
| BR00-0587-GATA3         | training                        | 68       | 1                           | 0                             | 3                                    | 2     | 0                                                                              | 37                                                      | 0          | 37                                             | 0                       | H1A6433-2990V2    | 59                       | 35                         | LuminalA                             | Luminal Breast Tumor                                                              | Stratagen Human Universal Reference that contained 1/10 added MCF7 and ME16C RNAs |                                                                                   |  |
| BR01-0123               | training                        | 49       | 0                           | 1                             | 2                                    | 3     | 1                                                                              | 31                                                      | 0          | 41                                             | 0                       | H1A9529-0092C     | 20                       | 36                         | HER2+ER-                             | HER2+ER Breast Tumor                                                              | Stratagen Human Universal Reference that contained 1/10 added MCF7 and ME16C RNAs |                                                                                   |  |
| BR01-0125               | training                        | 40       | 1                           | 1                             | 2                                    | 3     | 0                                                                              | 33                                                      | 0          | 33                                             | 0                       | H1A6433-2992V2    | 79                       | 37                         | LuminalB                             | Luminal Breast Tumor                                                              | Stratagen Human Universal Reference that contained 1/10 added MCF7 and ME16C RNAs |                                                                                   |  |
| BR01-0246               | training                        | 36       | 1                           | 1                             | 2                                    | 2     | 0                                                                              | 31                                                      | 0          | 31                                             | 0                       | H1A9529-0093C     | 76                       | 38                         | LuminalA                             | Luminal Breast Tumor                                                              | Stratagen Human Universal Reference that contained 1/10 added MCF7 and ME16C RNAs |                                                                                   |  |
| BR01-0349               | training                        | 37       | 1                           | 1                             | 3                                    | 3     | 1                                                                              | 3                                                       | 1          | 24                                             | 1                       | H1A9529-0047C     | 128                      | 39                         | LuminalA                             | Luminal Breast Tumor                                                              | Stratagen Human Universal Reference that contained 1/10 added MCF7 and ME16C RNAs |                                                                                   |  |
| BR84-1083               | training                        | 48       | 0                           | 1                             | 3                                    | 1     | 1                                                                              | 23                                                      | 1          | 47                                             | 1                       | H1A6912-695V2     | 146                      | 40                         | LuminalA                             | Unclass Breast Tumor                                                              | Stratagen Human Universal Reference that contained 1/10 added MCF7 and ME16C RNAs |                                                                                   |  |
| BR85-0017               | training                        | 52       | 1                           | 1                             | 3                                    | 2     | 1                                                                              | 36                                                      | 1          | 64                                             | 1                       | H1A6261-1489V2    | 127                      | 41                         | LuminalB                             | Luminal Breast Tumor                                                              | Stratagen Human Universal Reference that contained 1/10 added MCF7 and ME16C RNAs |                                                                                   |  |
| BR85-0035               | training                        | 74       | 0                           | 1                             | 3                                    | 2     | 0                                                                              | 106                                                     | 0          | 106                                            | 0                       | H1A6912-6984V2    | 92                       | 42                         | LuminalA                             | Luminal Breast Tumor                                                              | Stratagen Human Universal Reference that contained 1/10 added MCF7 and ME16C RNAs |                                                                                   |  |
| BR85-0152               | training                        | 72       | 1                           | 0                             | 3                                    | 4     | 1                                                                              | 26                                                      | 0          | 101                                            | 1                       | H1A6912-6985V2    | 25                       | 43                         | HER2+ER-                             | HER2+ER Breast Tumor                                                              | Stratagen Human Universal Reference that contained 1/10 added MCF7 and ME16C RNAs |                                                                                   |  |
| BR85-0184               | training                        | 74       | 1                           | 0                             | 3                                    | 2     | 0                                                                              | 96                                                      | 0          | 96                                             | 0                       | H1A6912-6986V2    | 93                       | 44                         | LuminalB                             | Luminal Breast Tumor                                                              | Stratagen Human Universal Reference that contained 1/10 added MCF7 and ME16C RNAs |                                                                                   |  |
| BR86-0014               | training                        | 47       | 1                           | 1                             | 1                                    | 4     | 0                                                                              | 96                                                      | 0          | 96                                             | 0                       | H1A6912-6987V2    | 95                       | 45                         | LuminalA                             | Luminal Breast Tumor                                                              | Stratagen Human Universal Reference that contained 1/10 added MCF7 and ME16C RNAs |                                                                                   |  |
| BR87-0137-VIM           | pair 11                         | training |                             |                               |                                      |       |                                                                                |                                                         |            |                                                |                         | H1A6261-1489V2    | 33                       | 46                         | Basal                                | Basal Breast Tumor                                                                | Stratagen Human Universal Reference that contained 1/10 added MCF7 and ME16C RNAs |                                                                                   |  |
| BR87-0137-VIM-Int       | pair 11                         | training | 55                          | 0                             | 1                                    | 3     | 3                                                                              | 1                                                       | 20         | 1                                              | 21                      | H1A6261-1490V2    | 34                       | 34                         | Basal                                | Basal Breast Tumor                                                                | Stratagen Human Universal Reference that contained 1/10 added MCF7 and ME16C RNAs |                                                                                   |  |
| BR87-1045               | training                        | 44       | 1                           | 1                             | 2                                    | 2     | 0                                                                              | 31                                                      | 0          | 31                                             | 0                       | H1A9529-0048C     | 120                      | 47                         | LuminalA                             | Luminal Breast Tumor                                                              | Stratagen Human Universal Reference that contained 1/10 added MCF7 and ME16C RNAs |                                                                                   |  |
| BR88-0161               | training                        | 57       | 0                           | 1                             | 2                                    | 2     | 1                                                                              | 36                                                      | 0          | 60                                             | 0                       | H1A9529           |                          |                            |                                      |                                                                                   |                                                                                   |                                                                                   |  |
